# Supplementary material for: Combined the SMAC mimetic and BCL2 inhibitor sensitizes neoadjuvant chemotherapy by targeting necrosome complexes in tyrosine aminoacyl-tRNA synthase-positive breast cancer
Source: Springer Nature journal article supplement (doi:10.1186/s13058-020-01367-7), 2020-11-25

**Figure 1**

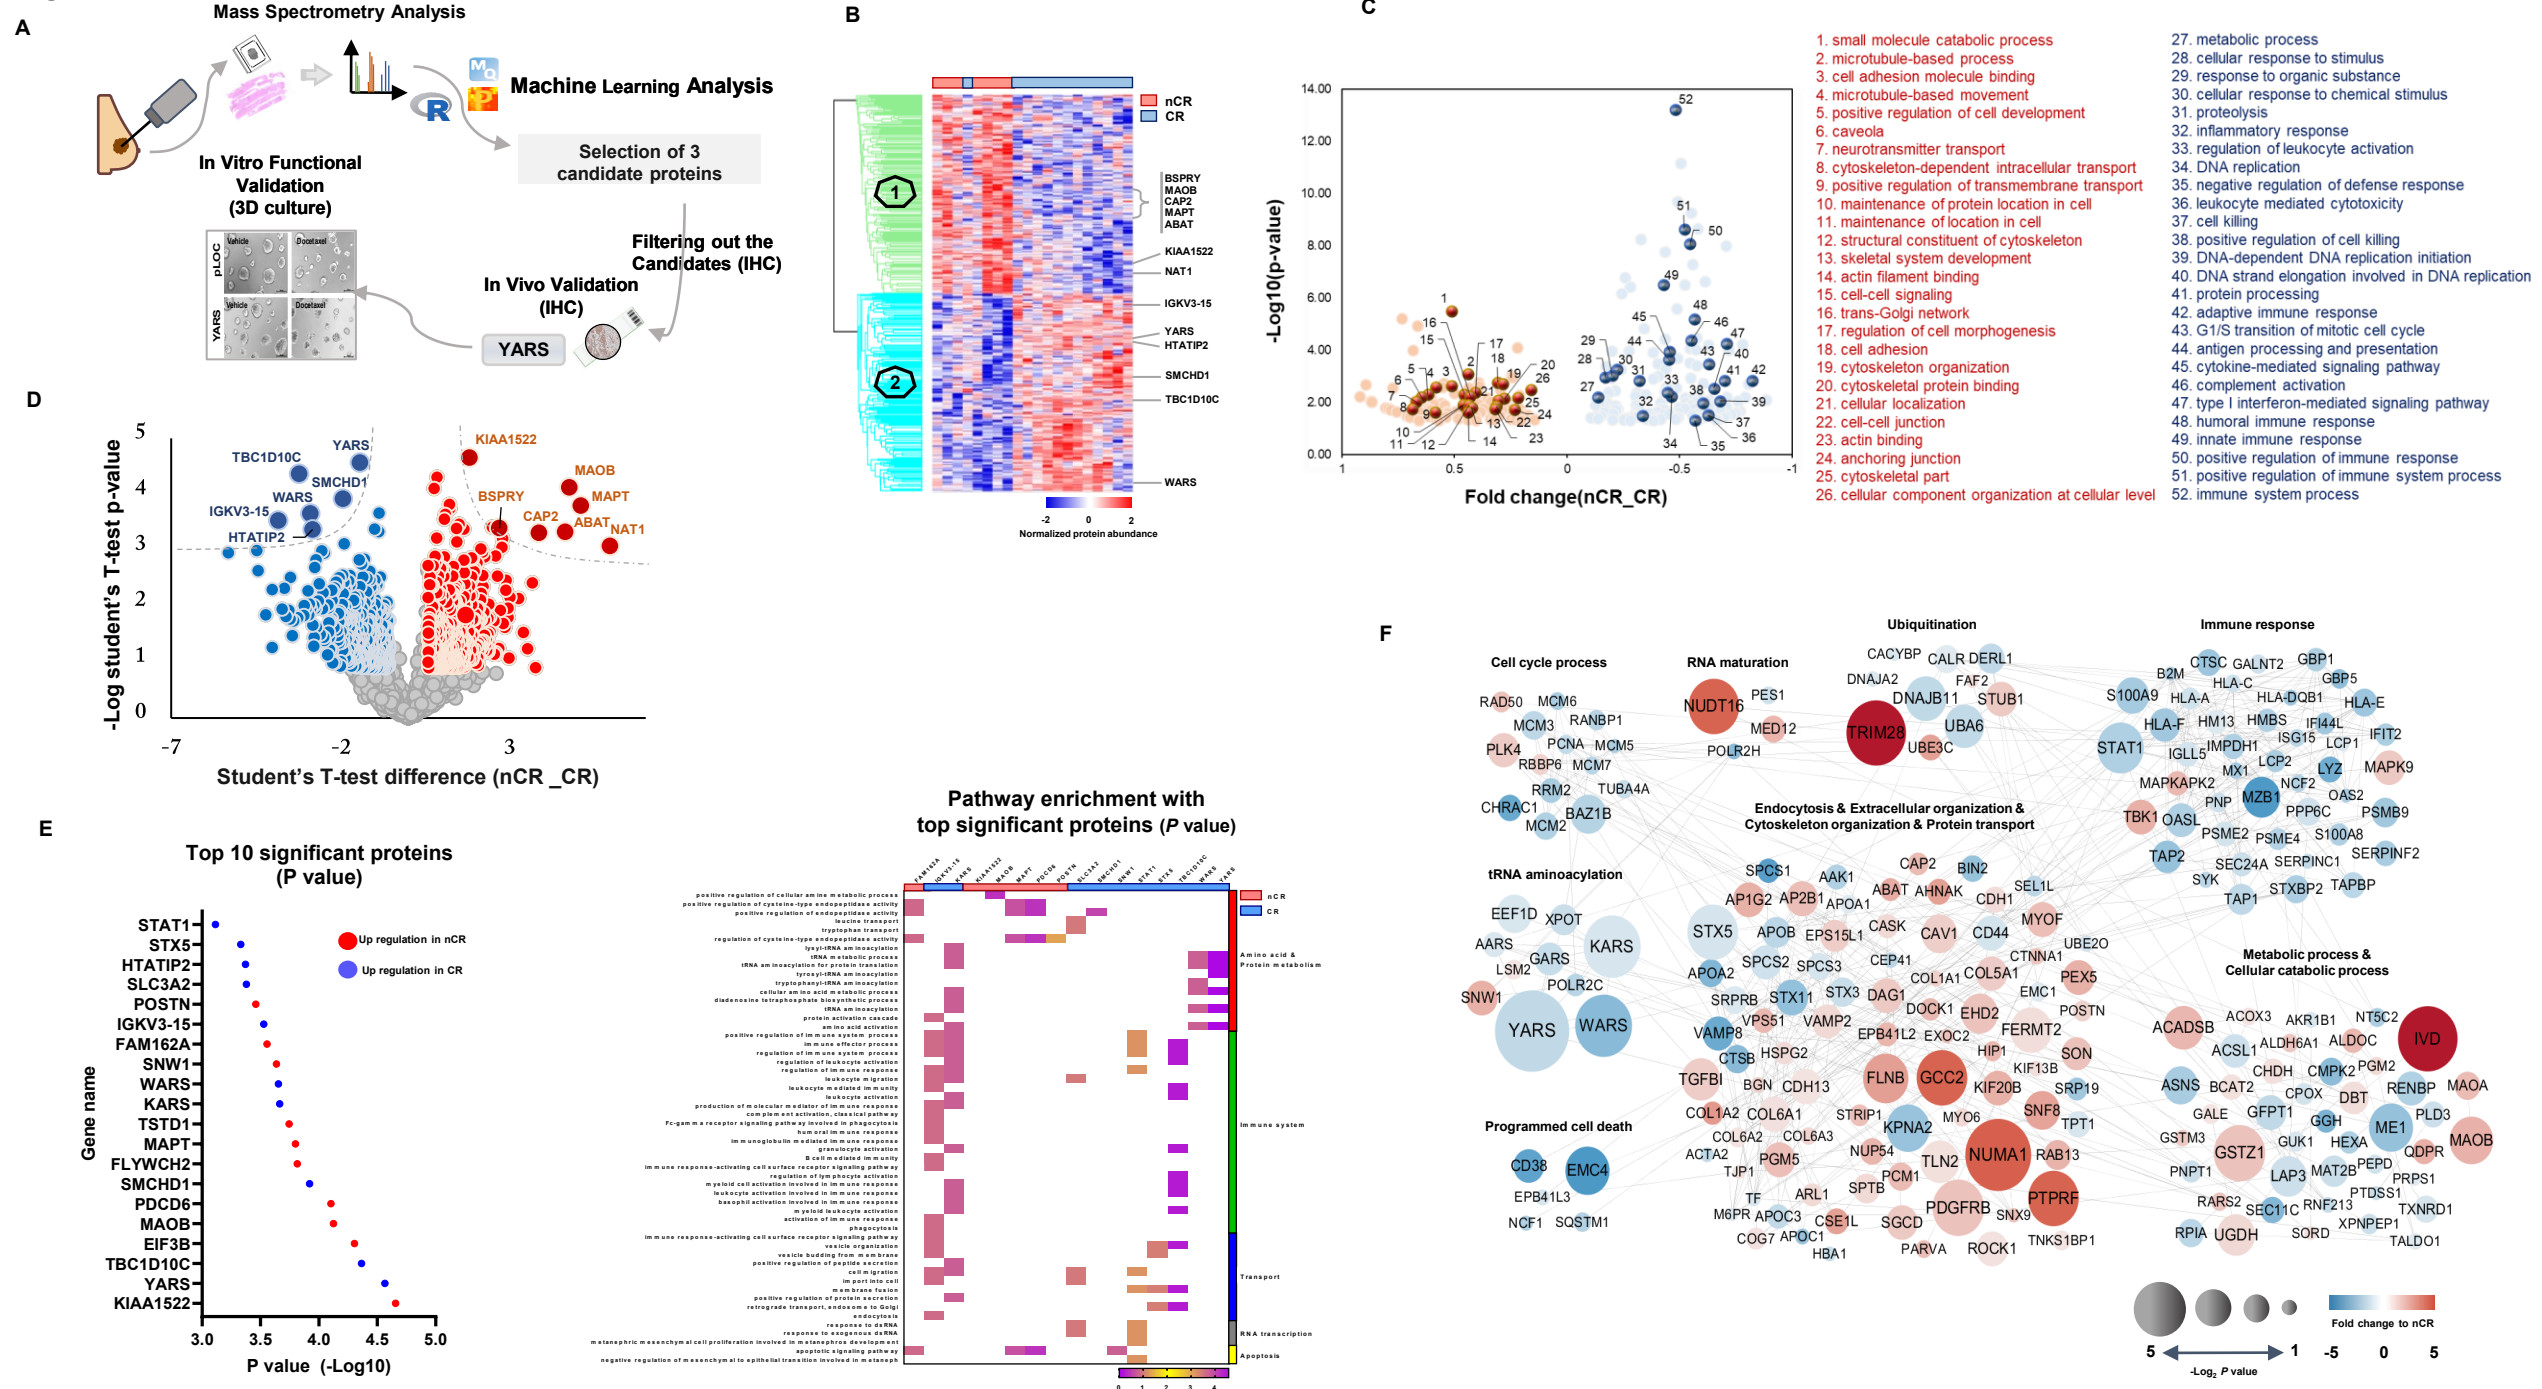

**Figure 2**

**A**

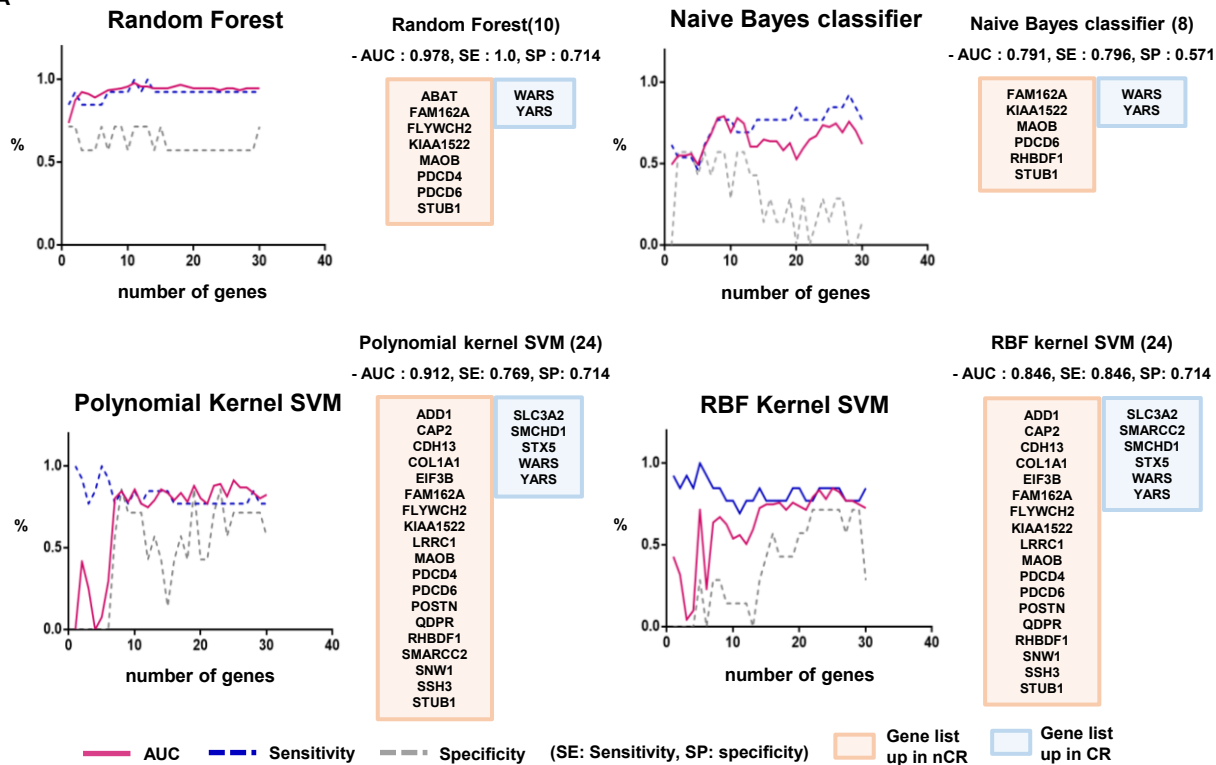

**B**

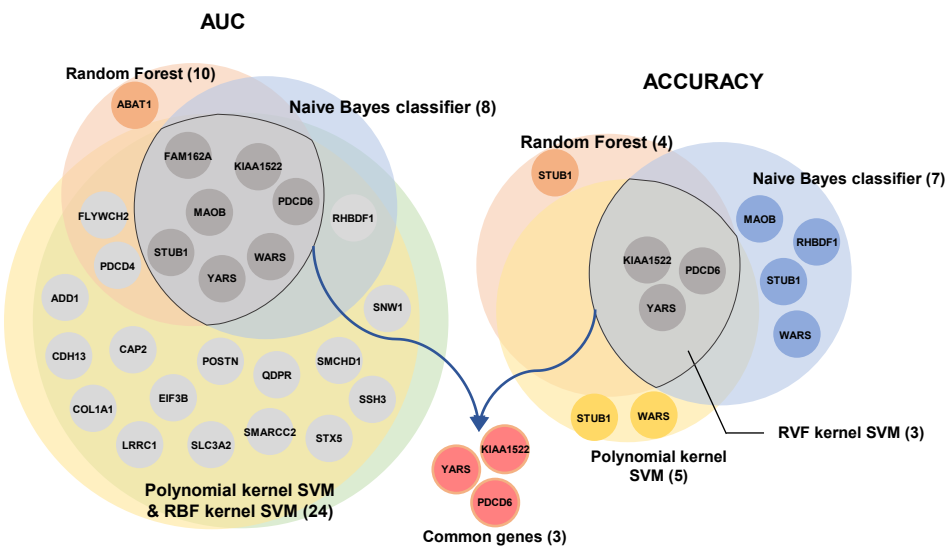

**C**

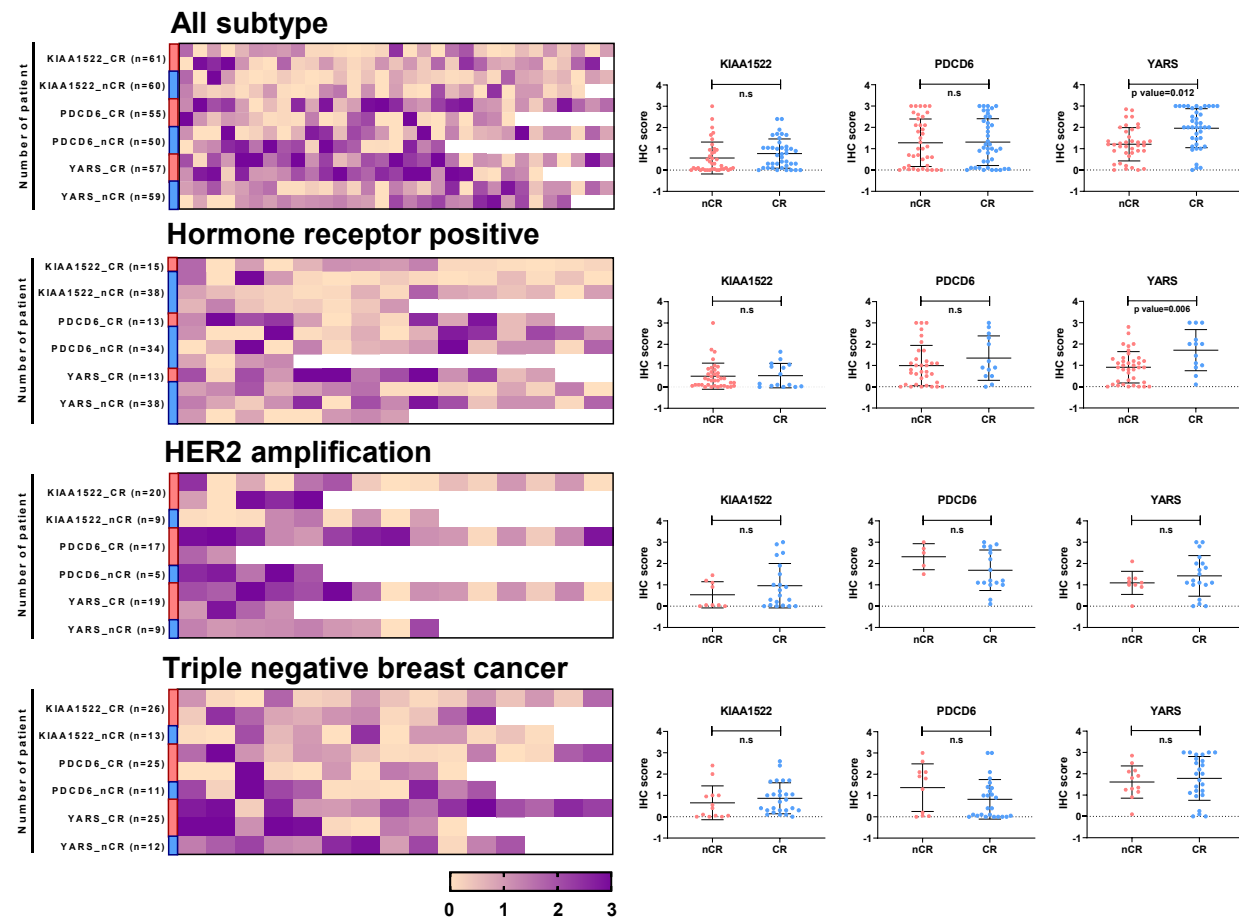

**Figure 3**

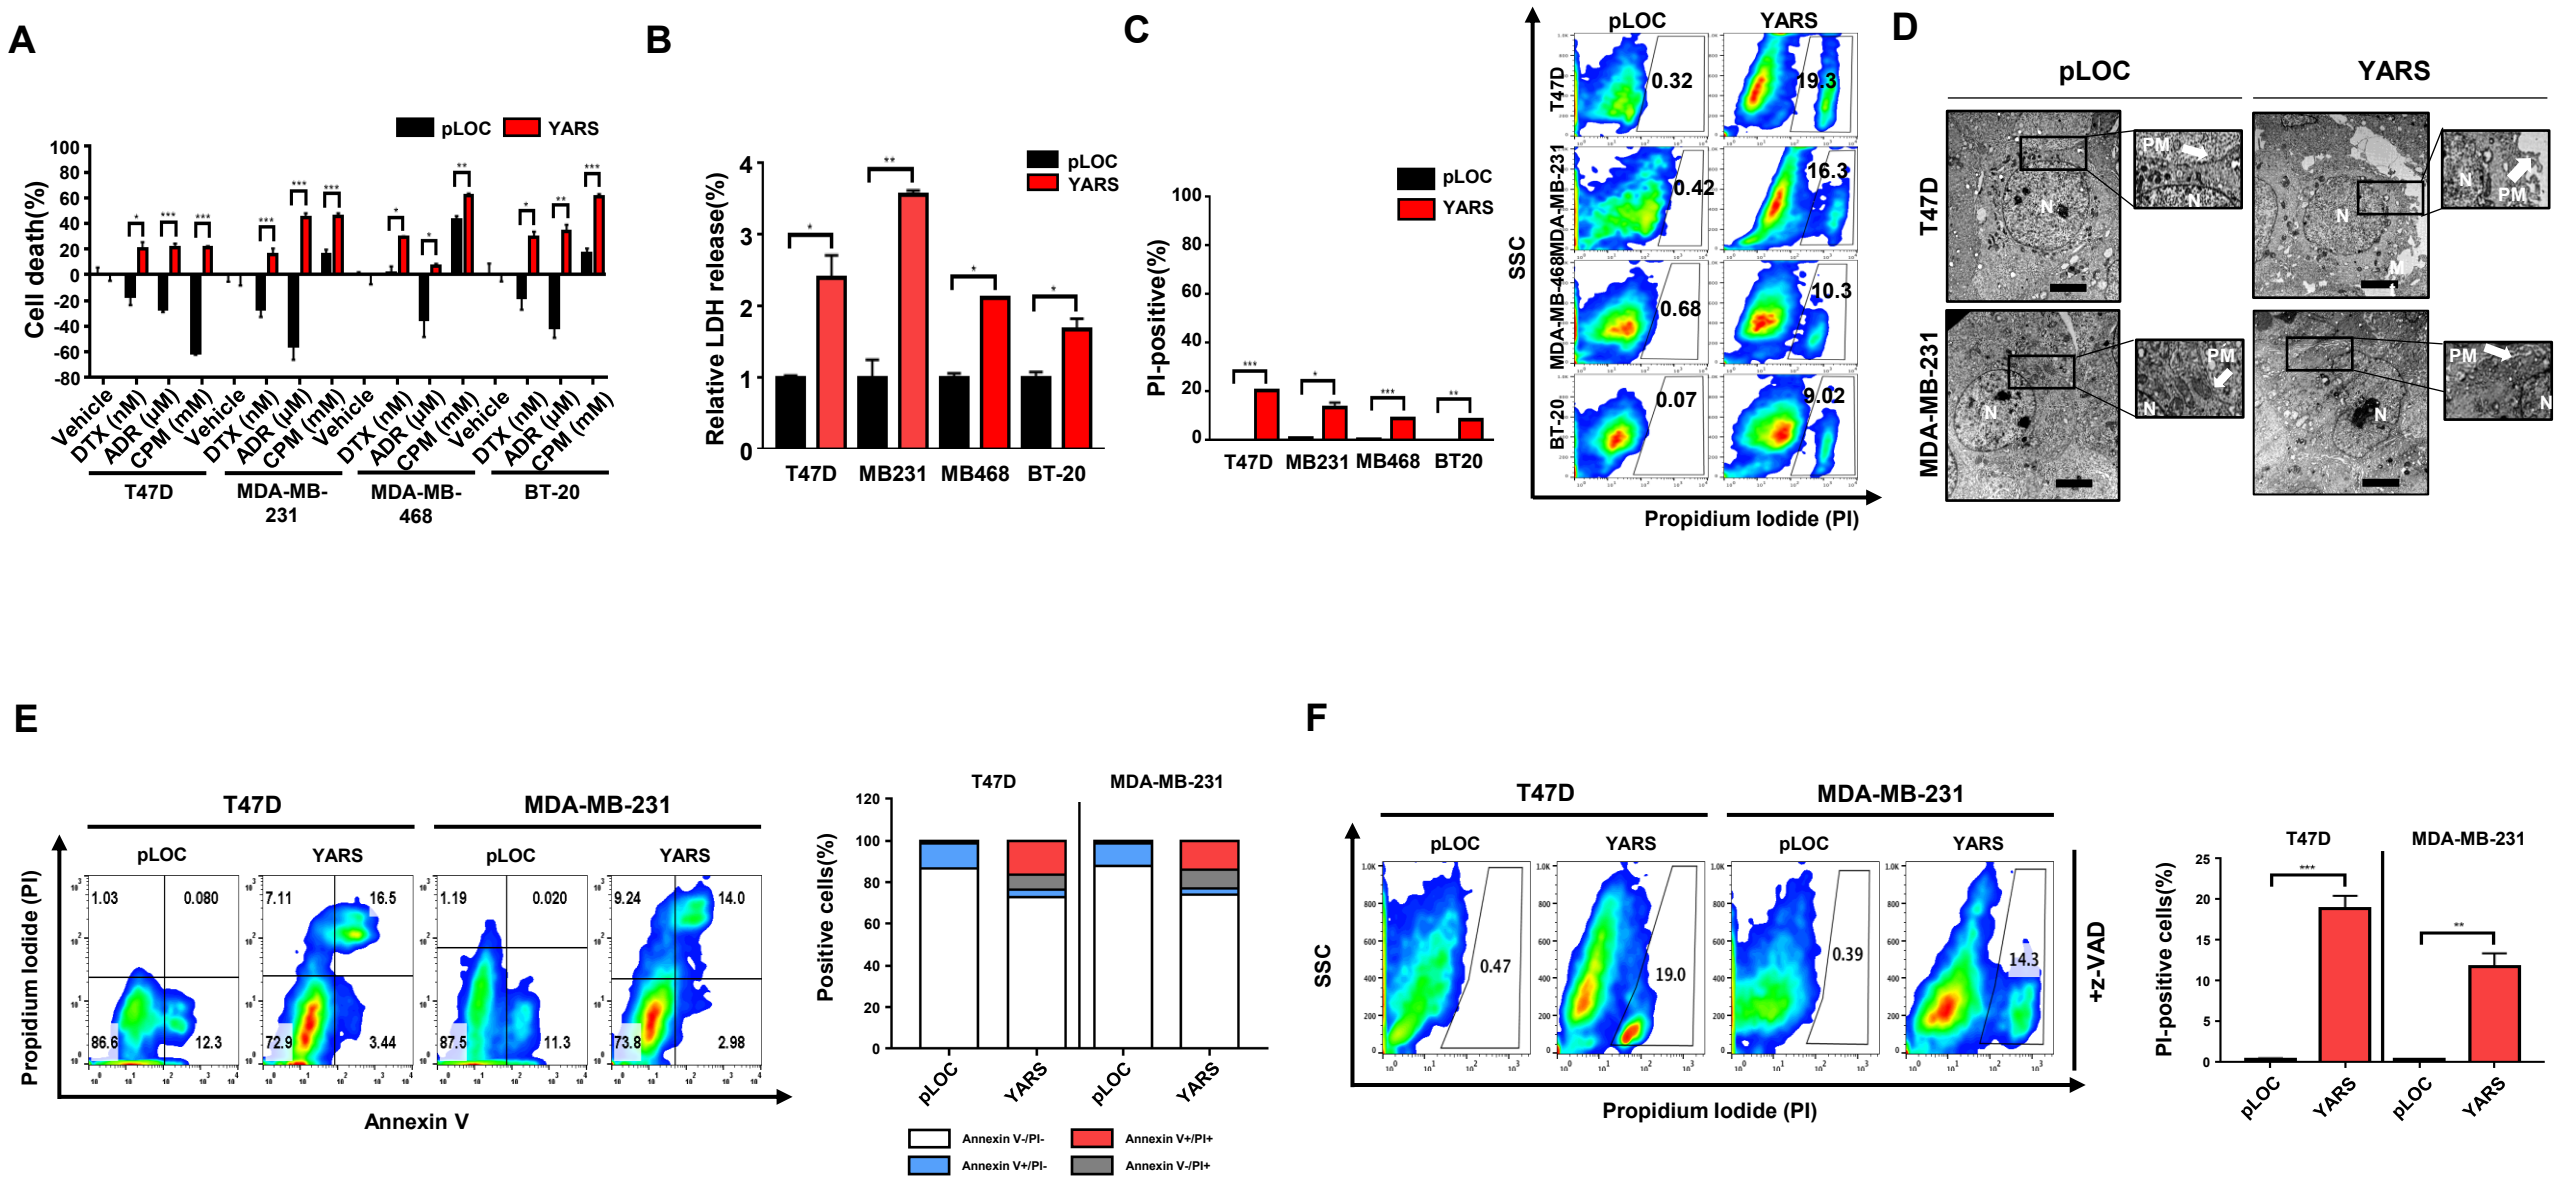



**Figure 4**

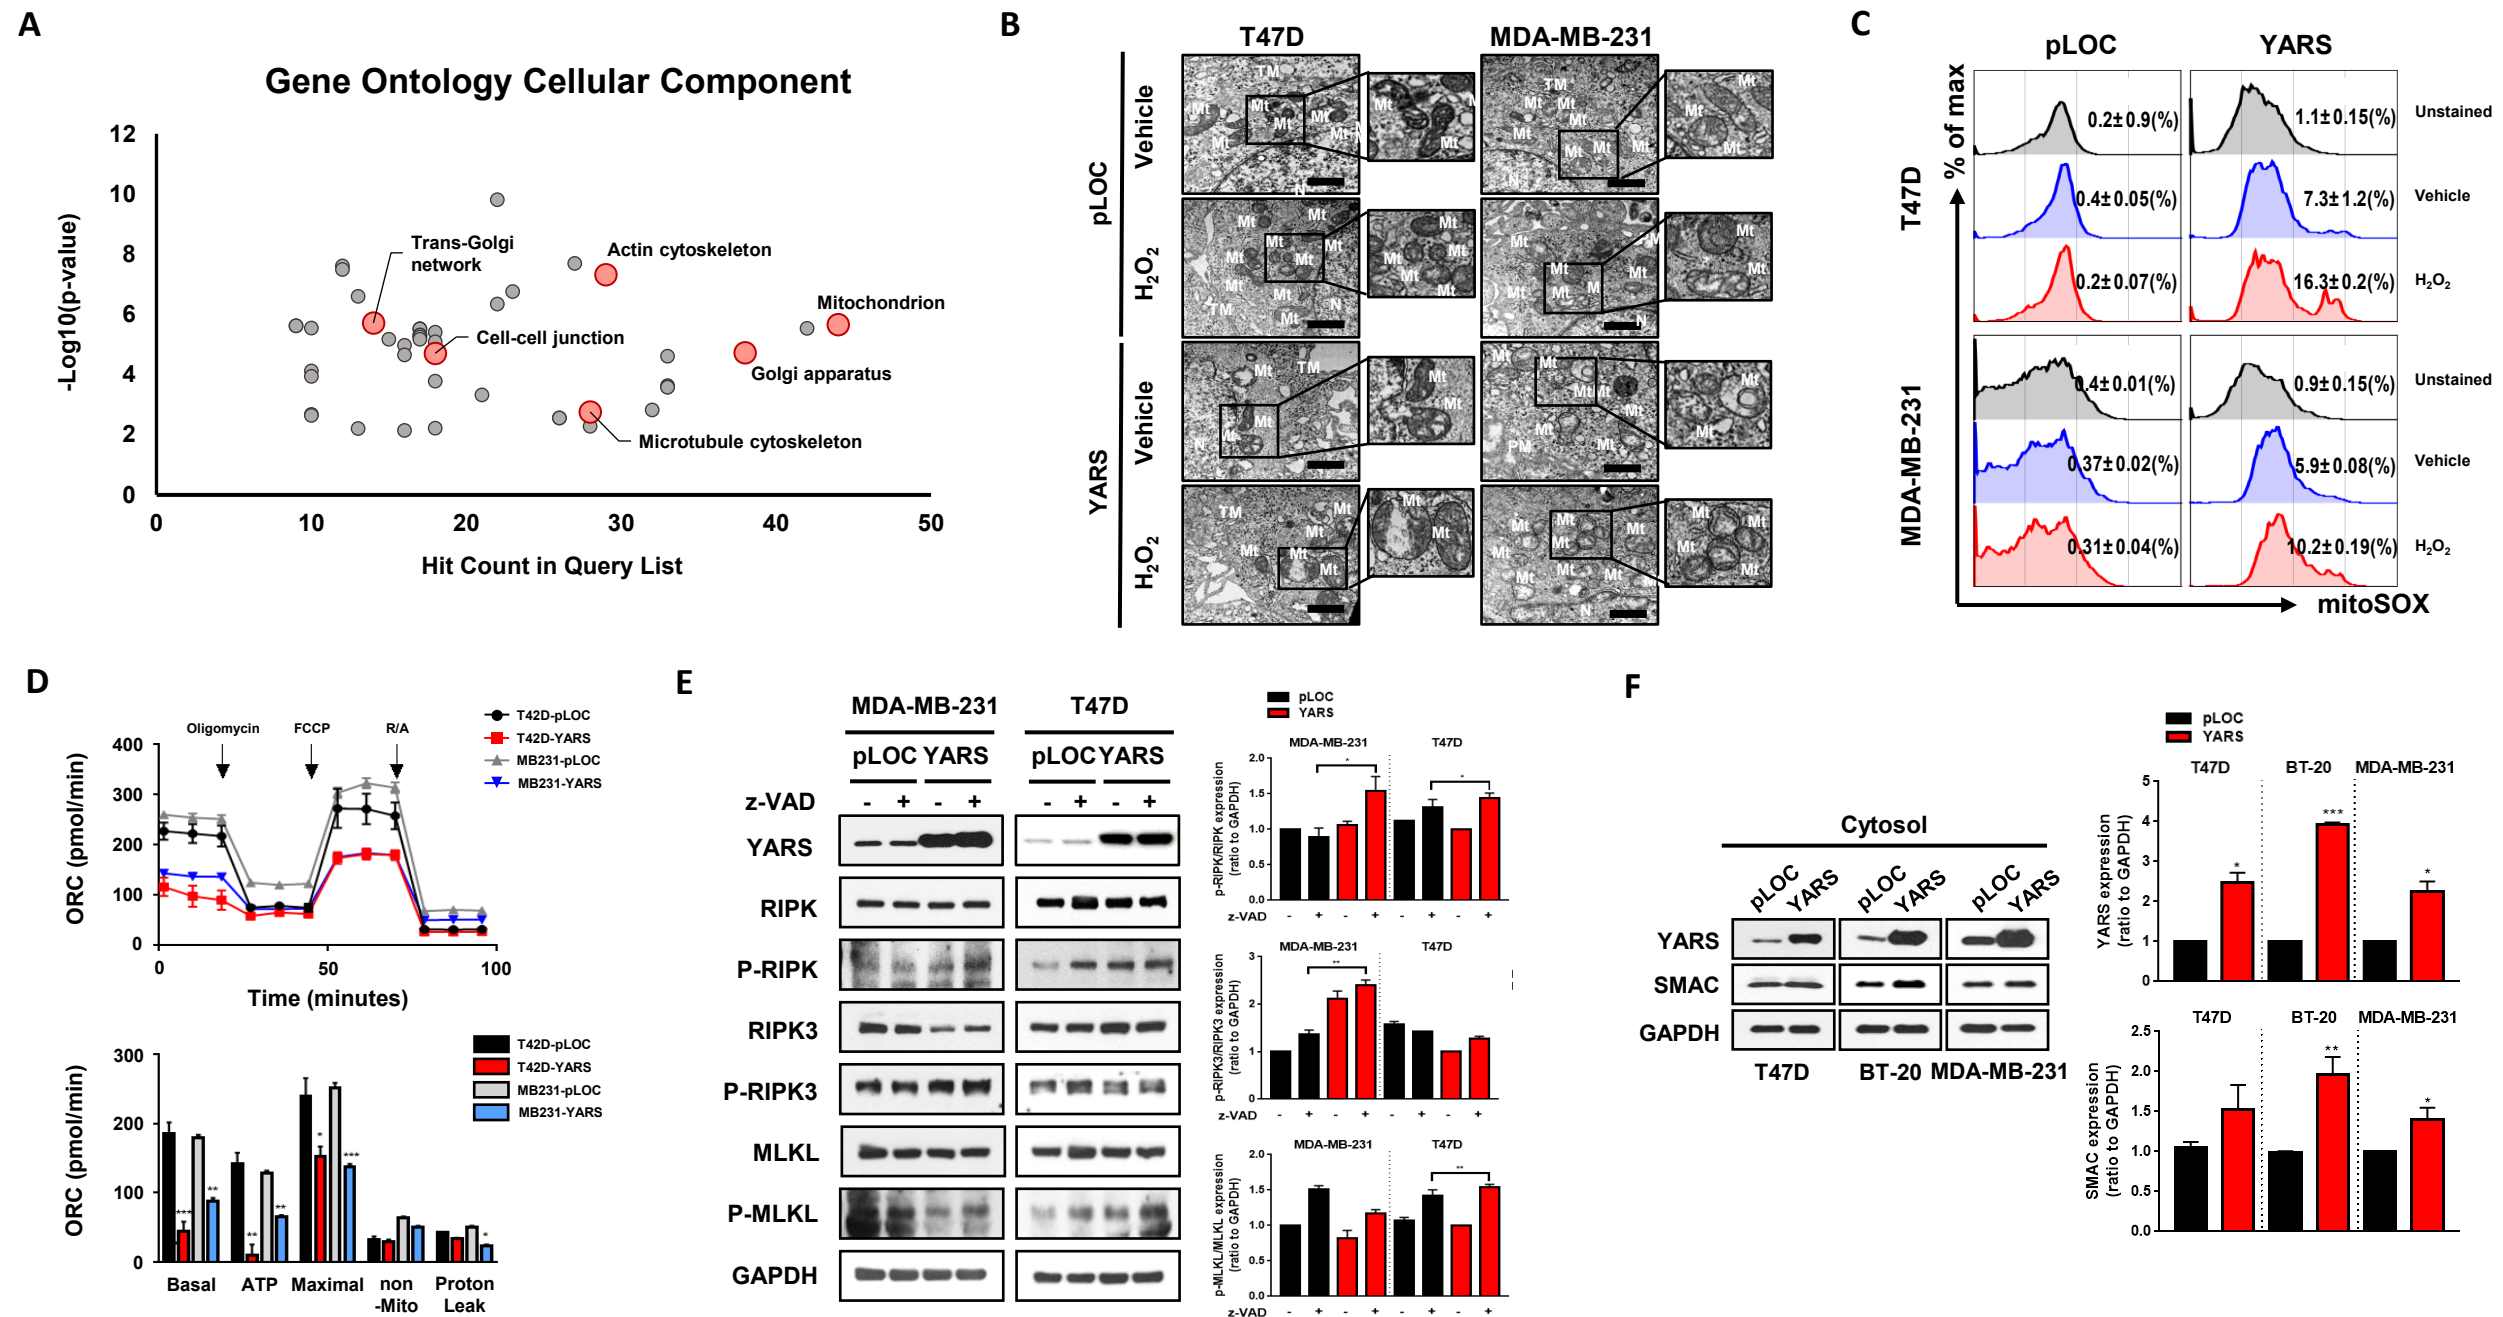

**Figure 5**

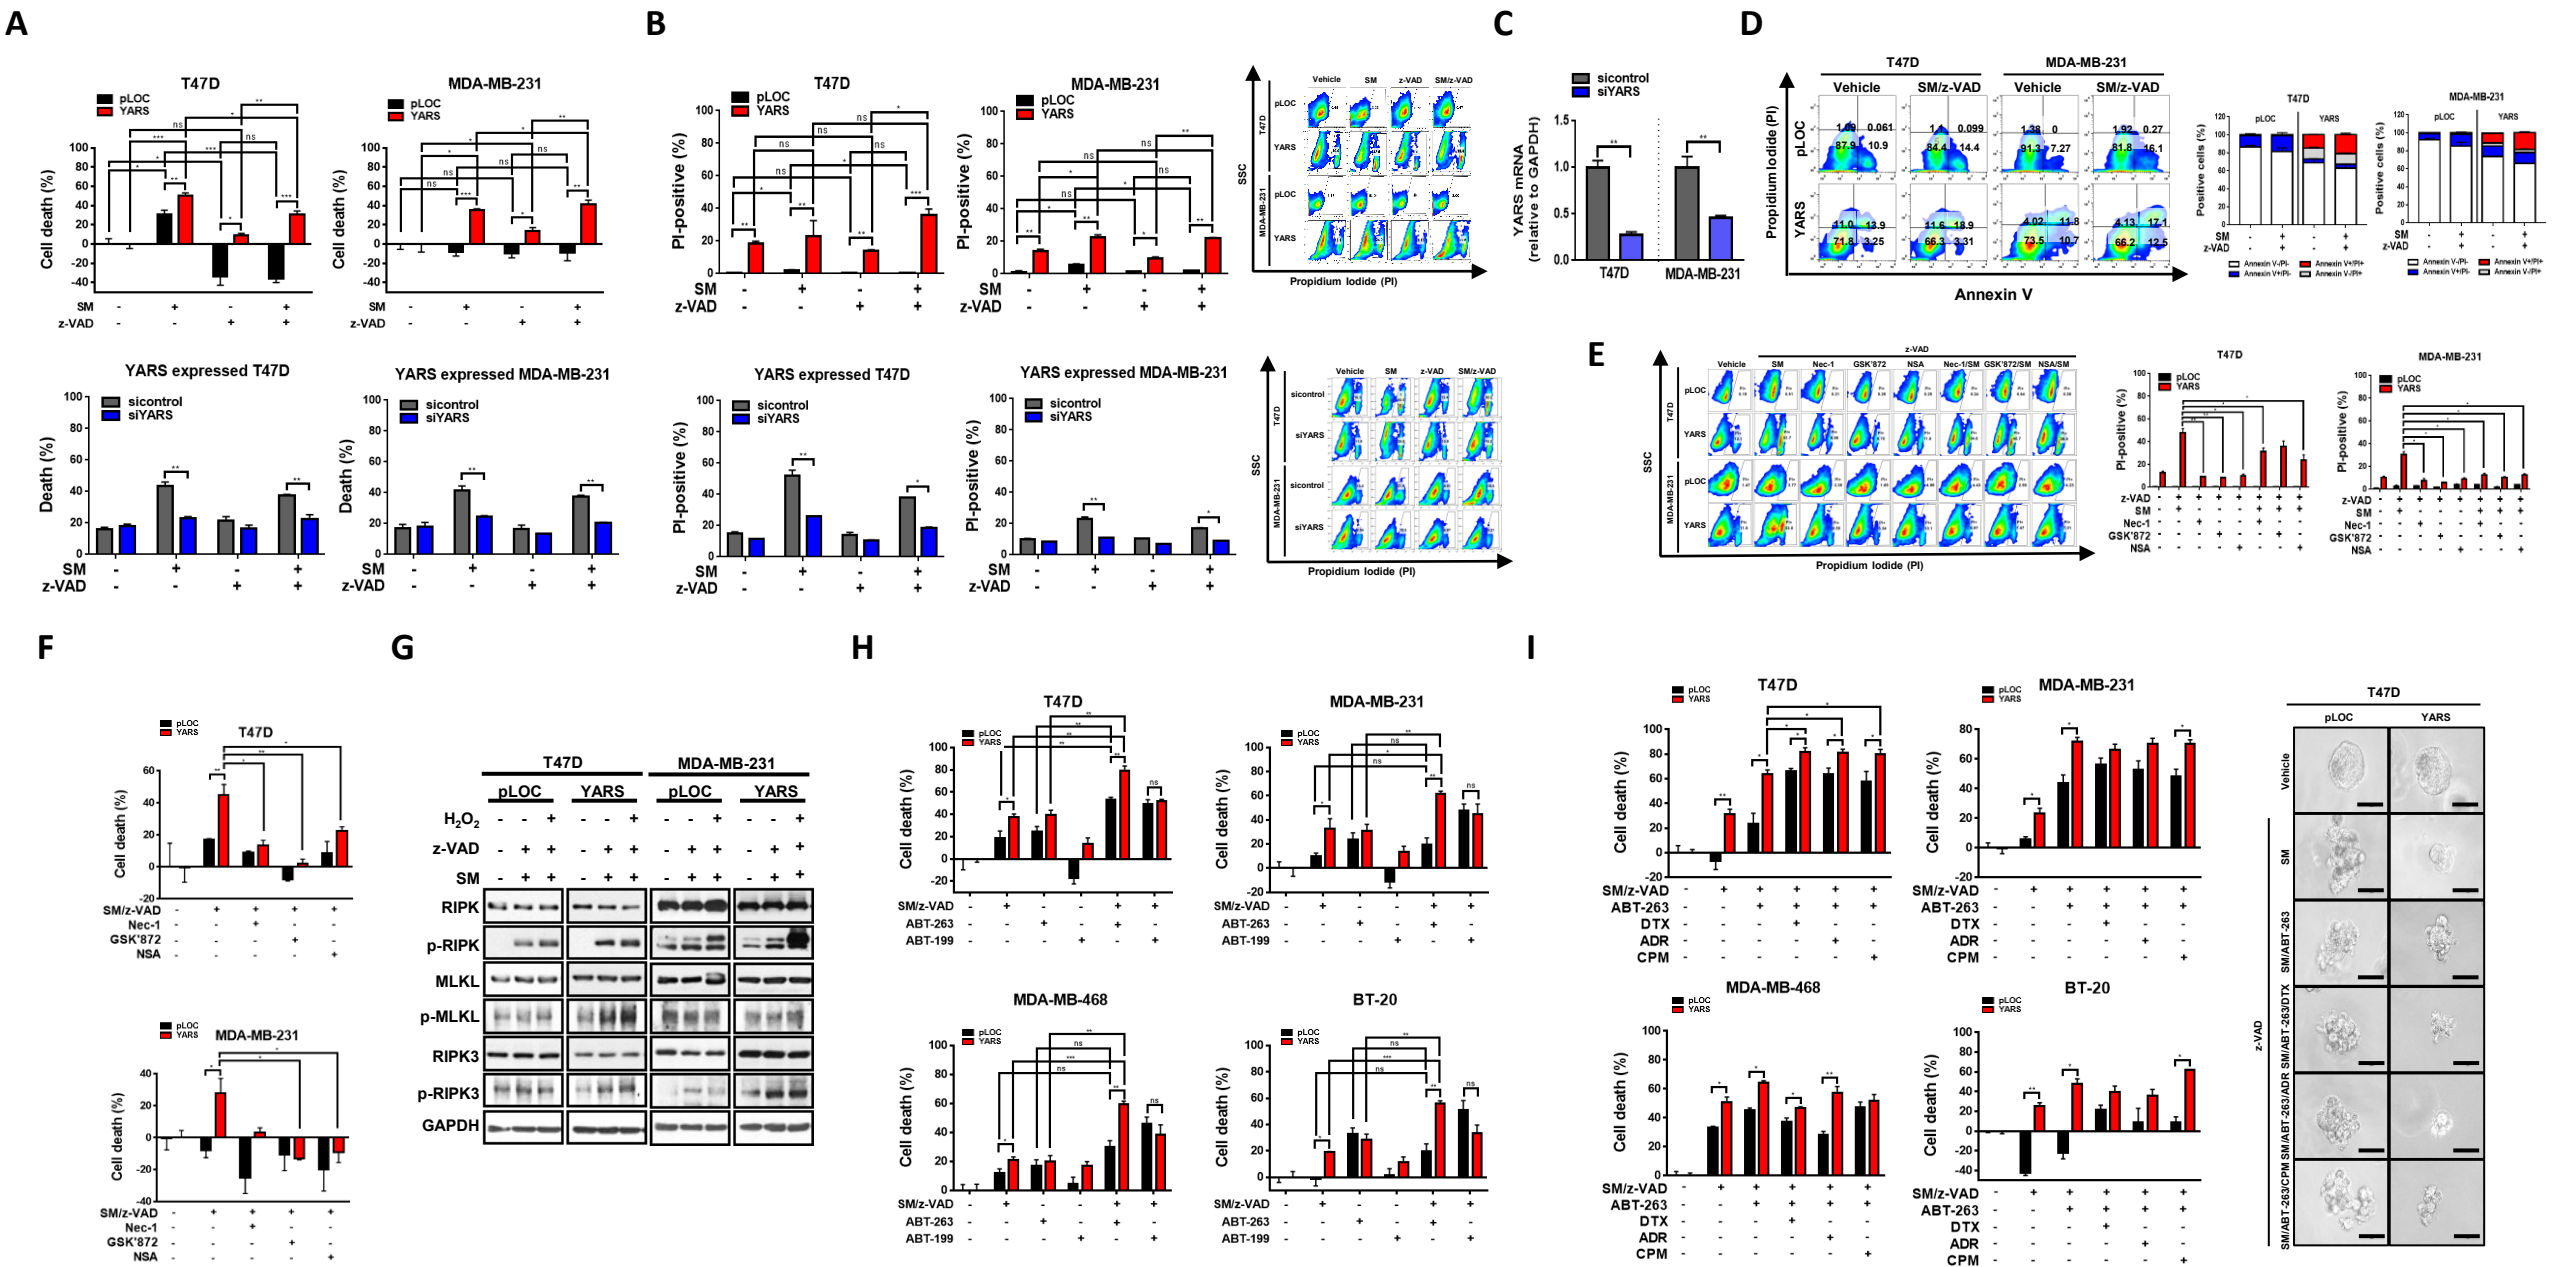

Figure 6

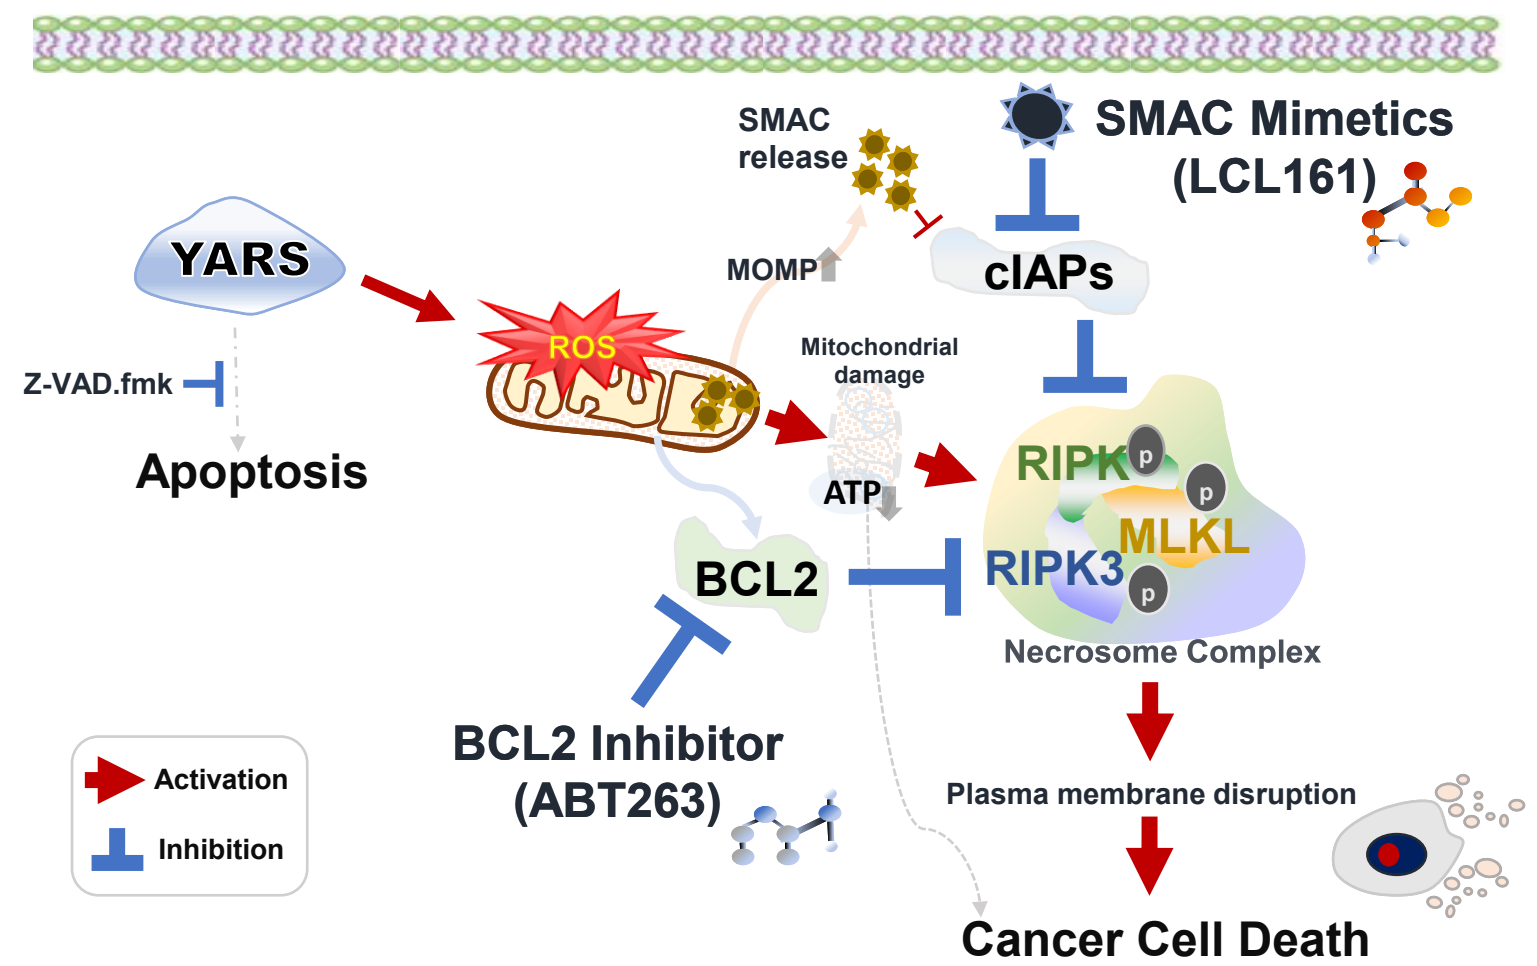

Supplementary Figure S1

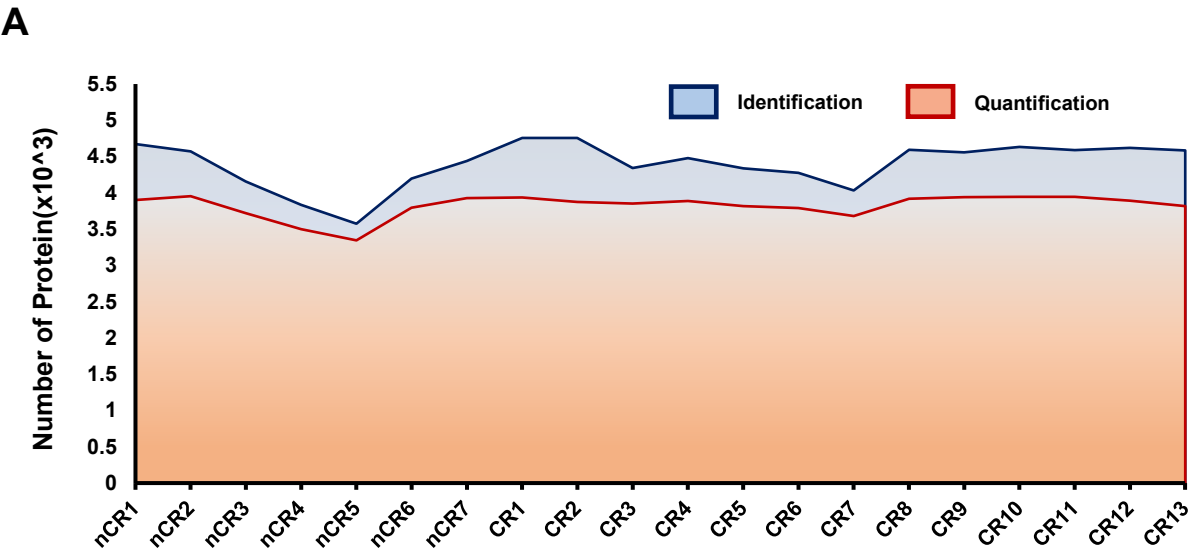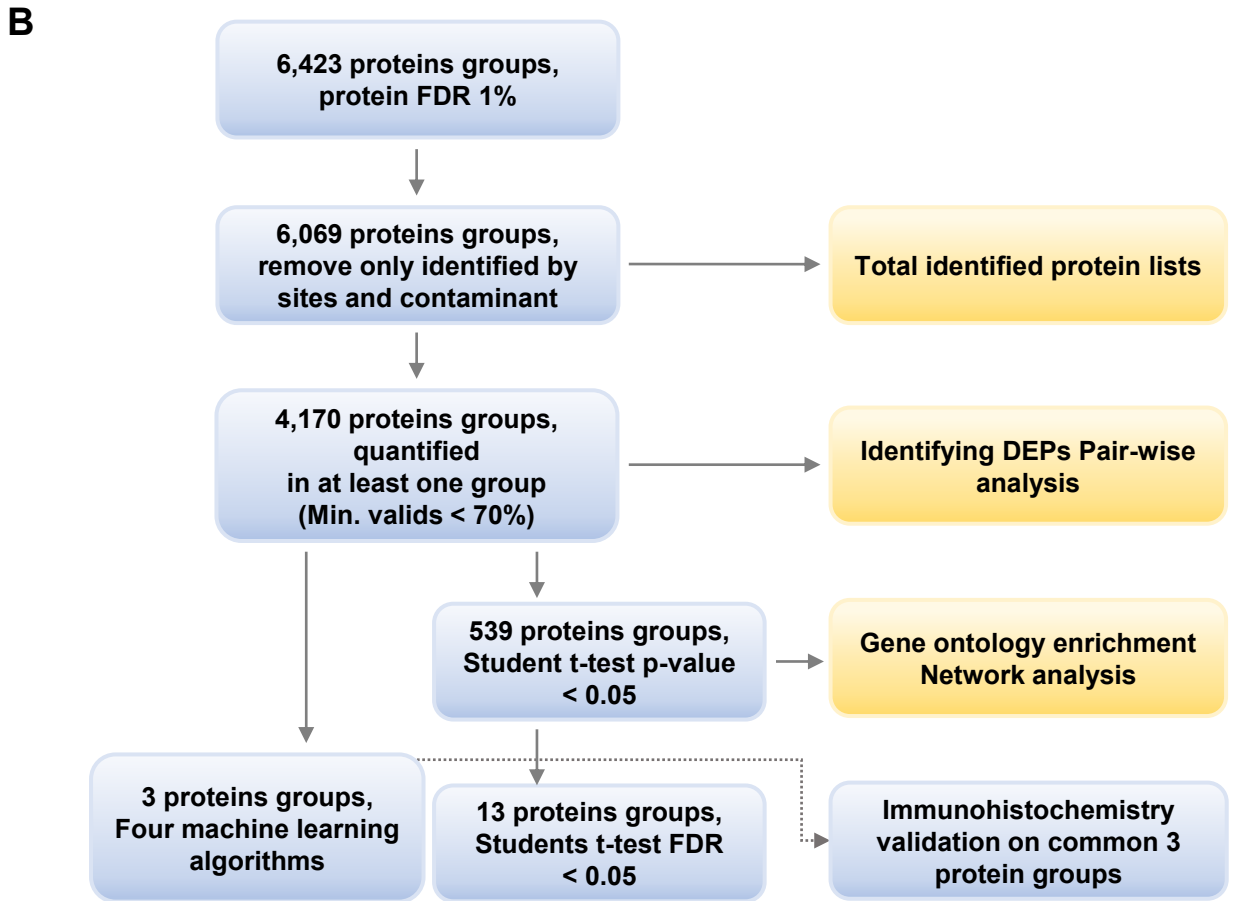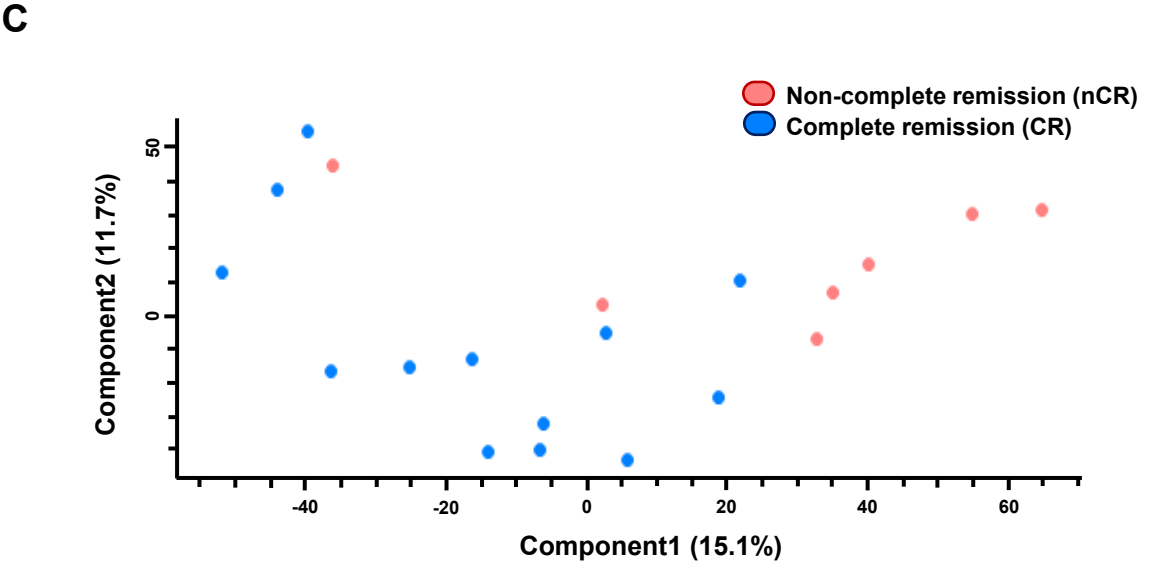

Supplementary Figure S2

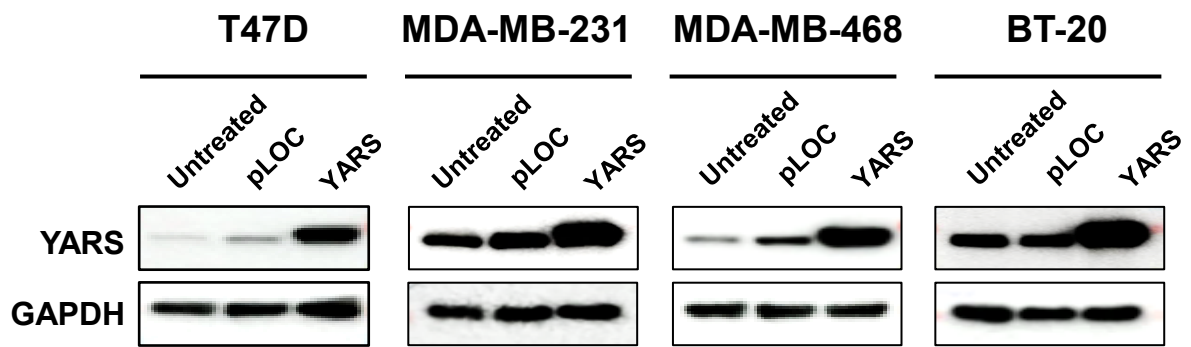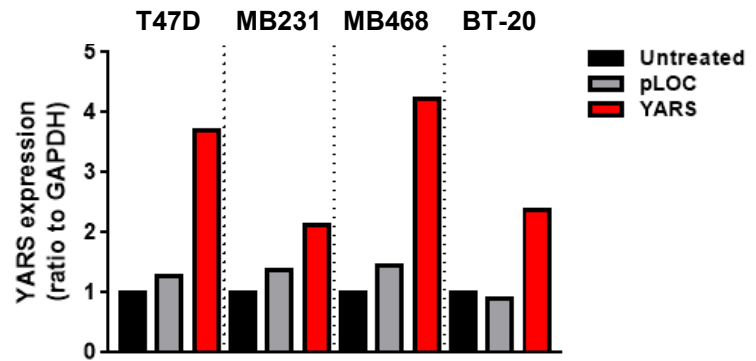



**A**

**MLKL vs. BCL2**

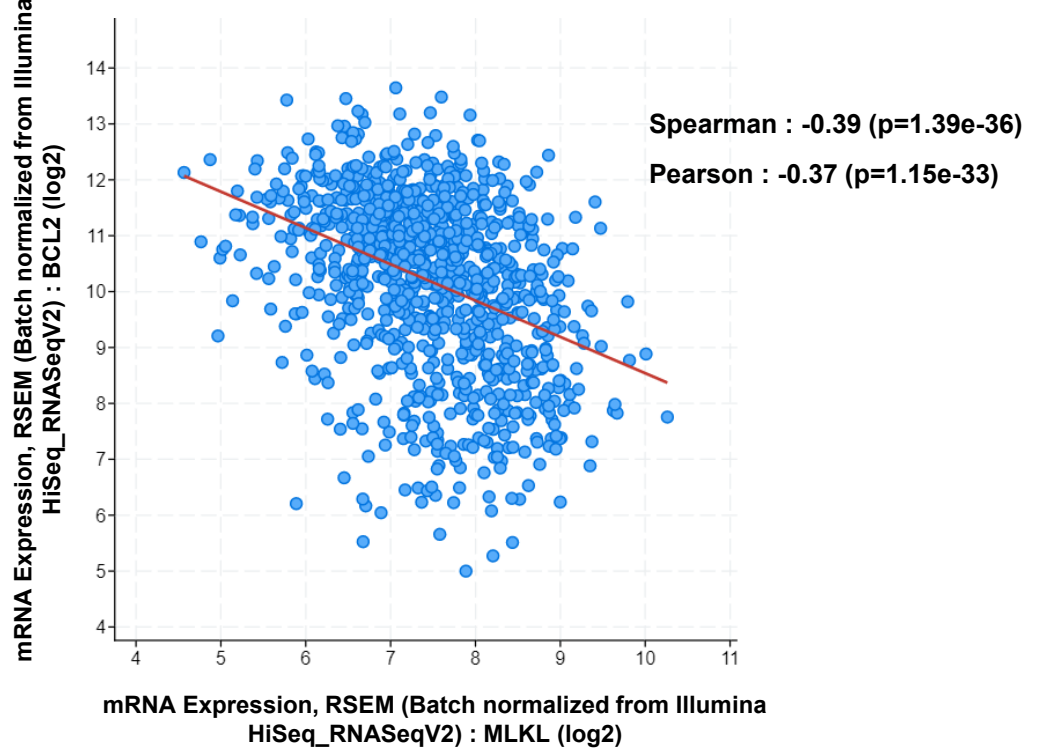

**B**

**RIPK vs. BCL2**

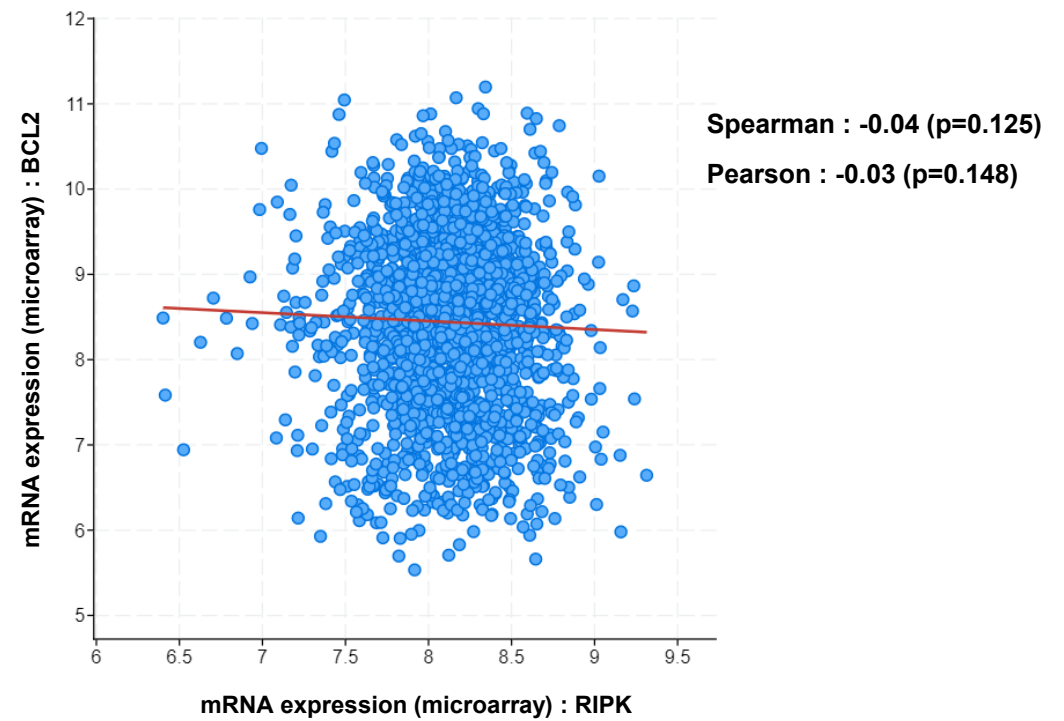

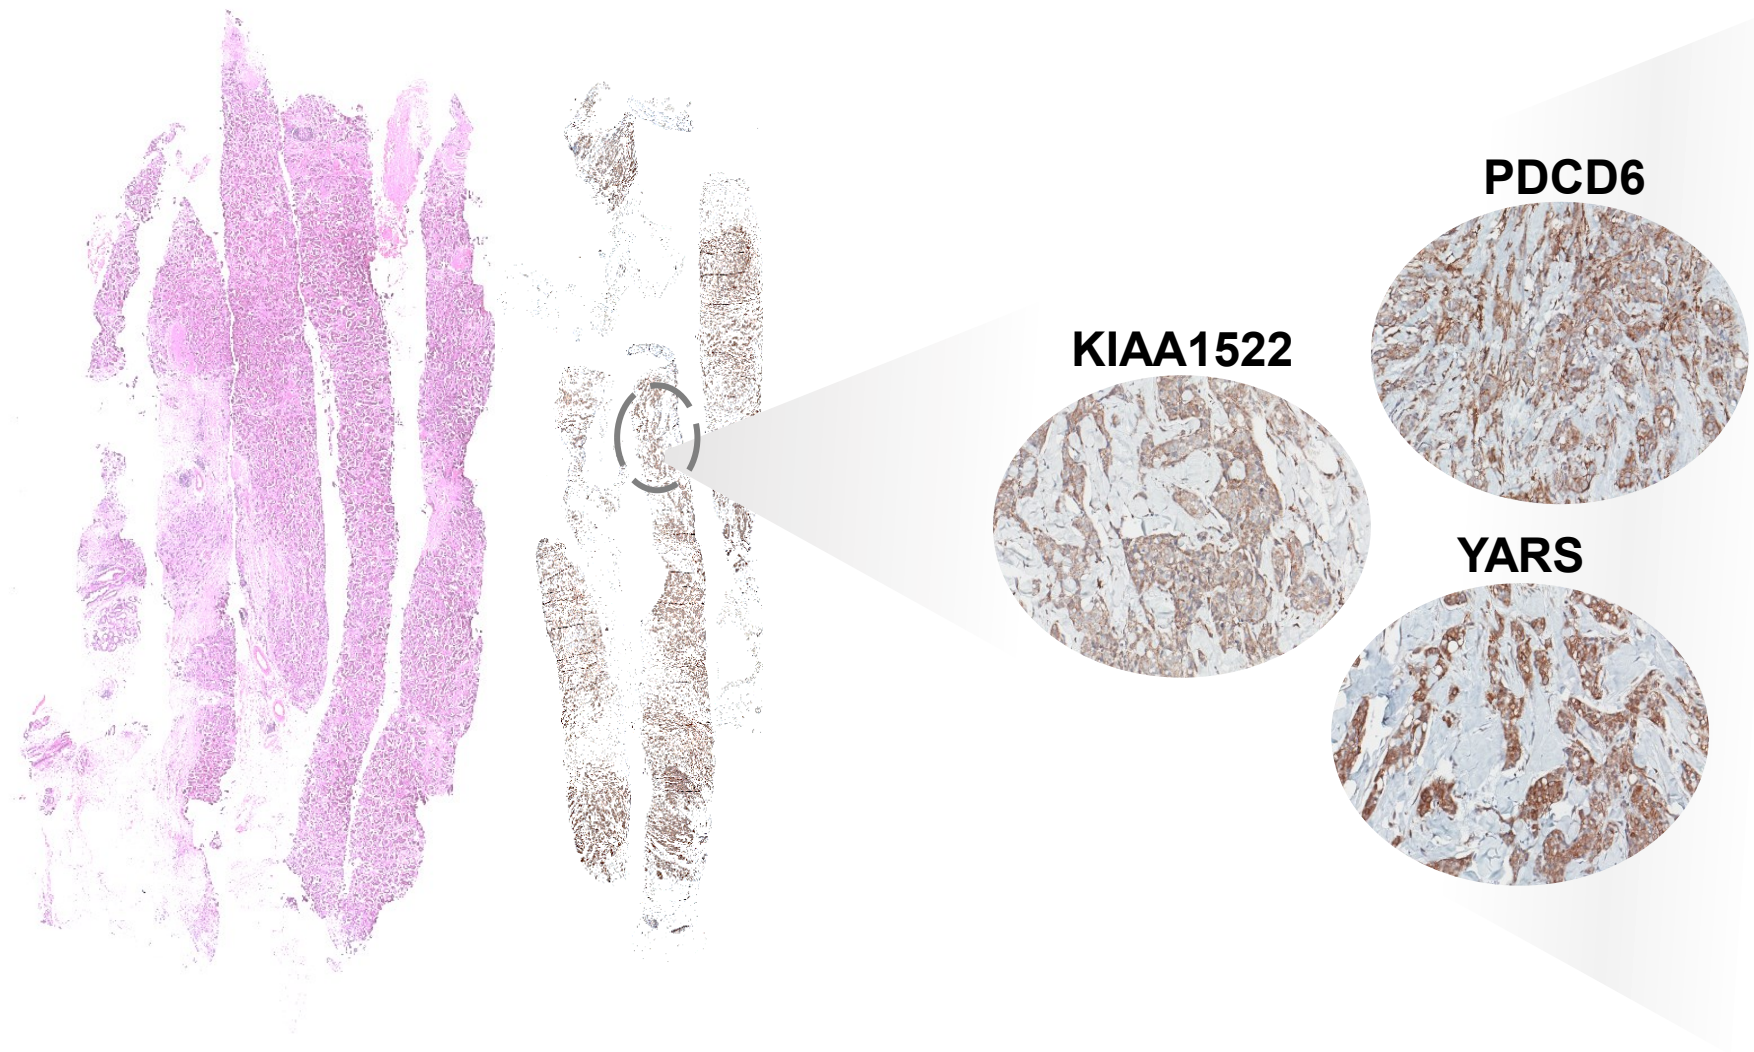

A

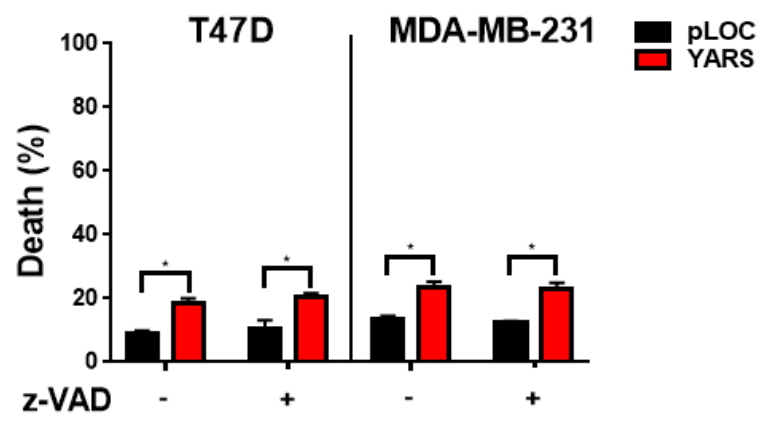

B

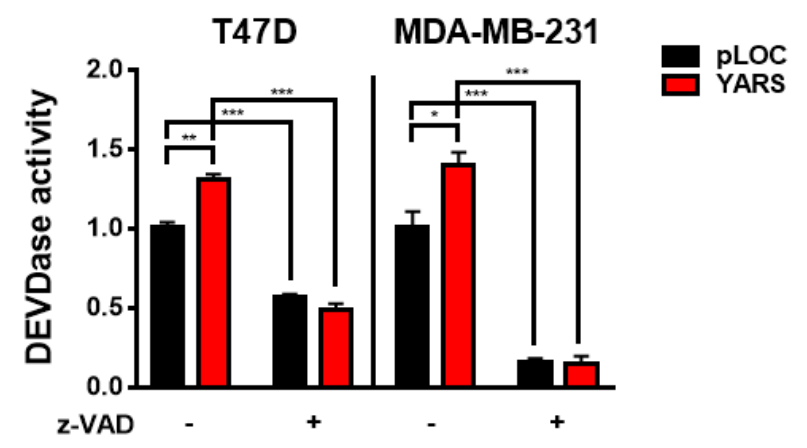

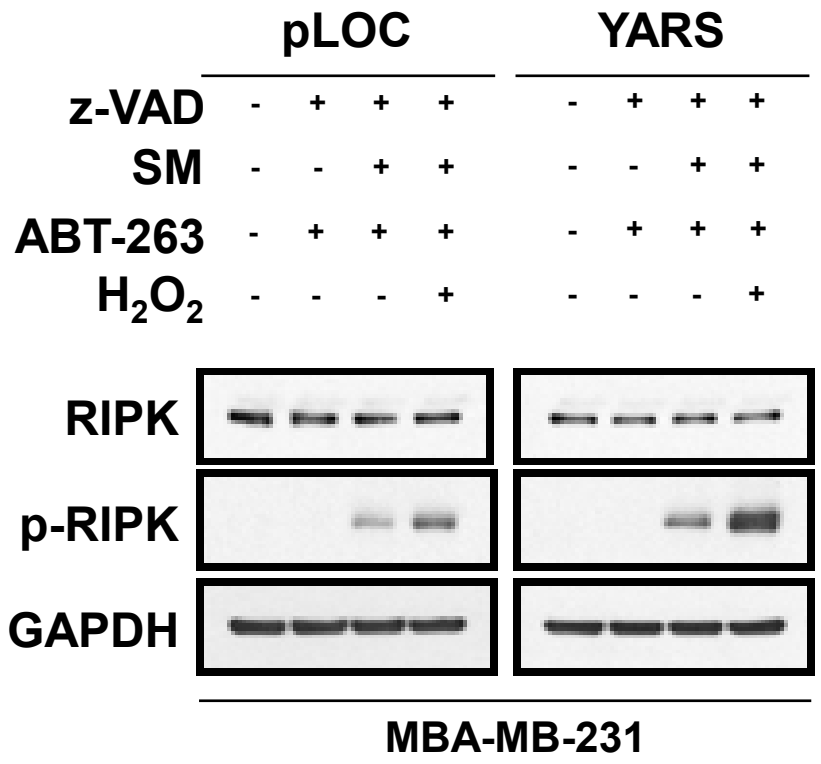

Supplement: MOESM1 [file 18625882]
